# Supplementary material for: Testung auf Mismatch-Reparatur-Defizienz und Mikrosatelliteninstabilität
Source: Springer Nature journal article supplement (doi:10.1007/s00292-023-01209-1), 2023-08-07
Supplement: MOESM1 [file 292_2023_1209_MOESM1_ESM.pdf]

Tab. S1 Häufigkeitsverteilung der unterschiedlichen Befundkonstellationen im französischen Tumorkollektiv (nach [10])

|                    | Klassischer Befund                                   | Ungewöhnlicher dMMR Befund |                                                      |                                                 |                                        |                                                     |
|--------------------|------------------------------------------------------|----------------------------|------------------------------------------------------|-------------------------------------------------|----------------------------------------|-----------------------------------------------------|
|                    | MSI-H & MLH1/PMS2<br>oder MSH2/MSH6 Verlust<br>n=496 | Gesamt<br>n=89             | isoliert PMS2 oder<br>MSH6 Verlust<br>Gruppe 1, n=53 | dMMR klassisch<br>& MSS/MSI-L<br>Gruppe 2, n=16 | pMMR<br>& MSI-H/MSI-L<br>Gruppe 3, n=5 | komplexer MMR-<br>Protein Verlust<br>Gruppe 4, n=15 |
| Prävalenz (gesamt) | 85%                                                  | 15%                        | 59,6%                                                | 17,9%                                           | 5,6%                                   | 16,9%                                               |
| Nicht-CRC          | 13,1%                                                | 32,6%                      | 26,4%                                                | 62,5%                                           | 20,0%                                  | 26,7%                                               |
| Genetisch/LS       | 21,4%                                                | 44,9%                      | 45,3%                                                | 37,5%                                           | 53,3%                                  | 53,3%                                               |
| MLH1/PMS2          | 70-80%                                               | 16,8%                      | Gruppe 2                                             | 11                                              | kein MMR Ausfall                       | 5x alle vier                                        |
| MSH2/MSH6          | 20-30%                                               | 8,9%                       |                                                      | 5                                               |                                        | 3x drei                                             |
| MSH6               | s. ungewöhnlich                                      | 38,2%                      | 32                                                   | Gruppe 1                                        |                                        | 2x Nicht-Heterodimere                               |
| PMS2               |                                                      | 28,1%                      | 21                                                   |                                                 |                                        | 5x heterogen, unklar                                |
